# Supplementary material for: The clinical significance of CXCL16 in the treatment of advanced non‐small cell lung cancer
Source: PubMed Central journal article supplement (PMC7180569; doi:10.1111/1759-7714.13387), 2020-03-12

# Supplementary Figure 1

VEGF-A

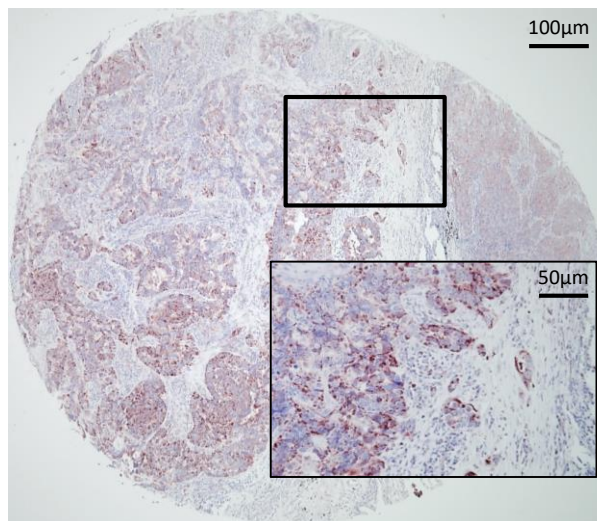

CXCL16

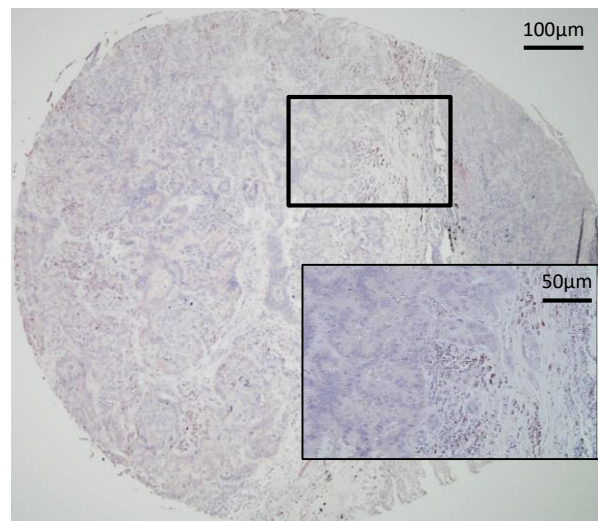

Supplement: TCA-11-1258-s001.pdf [file TCA-11-1258-s001.pdf]
